# Supplementary material for: Estimation of chronological age of Risso’s dolphin (Grampus griseus) based on DNA methylation frequency
Source: Frontiers journal article supplement (doi:10.3389/fmars.2024.1391674), 2024-06-03
Supplement: Table_1.XLSX [file Table_1.XLSX]

## Sheet: Supplement_Mori_et_al_Methylati
Supplementary material. DNA methylation frequencies at CpG sites of GRIA2, TET2, and CDKN2A genes for the samples used in this study.
Internal_Sample_ID	Age	Sex	GRIA2_CpG1	GRIA2_CpG2	GRIA2_CpG3	GRIA2_CpG4	GRIA2_CpG5	GRIA2_CpG6	GRIA2_CpG7	GRIA2_CpG8	GRIA2_CpG9	GRIA2_CpG10	GRIA2_CpG11	TET2_CpG1	TET2_CpG2	TET2_CpG3	TET2_CpG4	TET2_CpG5	TET2_CpG6	CDKN2A_CpG1	CDKN2A_CpG2	CDKN2A_CpG3	CDKN2A_CpG4	CDKN2A_CpG5	CDKN2A_CpG6	CDKN2A_CpG7
9	1	Female	0.75	0.87	0.93	1.46	1.89	1.46	2.49	1.36	2.99	1.45	0.8	NA	NA	NA	NA	NA	NA	3.3	7.17	2.52	9.35	4.77	8.47	3.02
143	4	Female	1.41	1.95	2.78	5.29	5.98	3.01	5.62	3.84	4.93	3.35	1.73	3.28	3.28	4.23	1.14	2.96	1.73	5.59	10.21	5.64	13.79	8.15	10.97	7.85
217	4	Male	1.45	1.45	1.85	2.95	3.99	2.04	3.77	2.18	2.99	1.89	1.28	6.7	2.13	2.06	0.97	1.57	1.25	3.88	7.65	3.41	10.35	6.6	9.73	3.75
213	5	Female	0.72	1.53	1.82	2.73	2.62	1.46	2.48	1.81	2.56	2.49	1.13	10.24	3.44	3.85	1.02	2.5	1.2	3.39	9.33	3.43	11.03	5.4	9.5	3.32
45	5	Male	1.8	2.16	2.6	4.35	5.08	2	4	2.78	2.61	2.56	1.38	6.76	1.26	2.05	0.79	2.18	1.49	4.65	10.22	5.35	12.46	7.12	11.47	5.59
36	7	Male	1.5	1.72	2.03	4.33	4.49	2.1	3.48	2.24	3.41	2.4	1.29	7.29	1.9	2.16	1.16	2.49	1.22	4.85	10.04	4.94	12.88	7.57	8.9	4.95
37	8	Male	1.66	2.88	2.69	5.56	5.92	2.41	3.37	2.26	3.84	2.63	1.48	8.12	1.5	1.89	0.75	1.68	0.96	4.53	8.8	5.44	11.67	7.9	9.7	5.23
144	10	Female	1.44	2.49	2.96	3.87	4.21	2.61	3.59	2.6	3.4	2.62	1.87	9.78	3.38	4.18	1.13	2.95	1.72	4.45	9.4	6.05	11.83	7.03	8.96	5.39
215	10	Female	1.13	1.8	2.1	2.61	3.19	1.69	2.9	1.9	2.99	2.46	1.34	9.98	4.1	4.5	1.33	2.46	1.83	2.73	6.62	3.21	7.31	5.56	6.19	2.73
224	10	Male	1.53	2.06	2.86	5.15	5.64	2.59	3.69	2.98	4.25	3.7	1.6	9.91	3.02	2.65	0.84	1.88	1.49	4.66	8.46	5.05	11.18	7.98	8.52	5.36
26	11	Female	2.96	2.96	3.22	7.09	7.61	3.8	5.86	3.77	5.17	3.69	2.09	10.31	3.53	4.55	1.21	2.52	1.84	5.51	10.06	5.16	13.03	8.5	11.29	6.54
222	11	Male	2.03	2.64	3.53	4.72	4.62	2.35	3.24	2.27	3.78	2.84	1.57	9.36	4.32	4.75	0.84	2.89	2.17	4.96	7.94	5.08	11.45	6.53	8.05	3.92
194	12	Male	1.9	2.71	3.27	5.64	5.76	3.08	4.73	3.11	3.86	3.31	1.64	8.81	3.21	3.97	0.83	2.39	1.58	5.74	11.59	5.51	12.53	9.68	10.82	6.14
225	14	Male	1.36	2.79	2.64	4.88	5.43	2.84	4.15	2.57	3.47	2.19	1.41	10.51	4.14	4.26	0.9	2.76	2.14	3.44	8.47	4.24	8.33	7.33	7.06	4.72
191	15	Male	2.03	2.55	3.32	4.79	4.88	3.12	5.05	3.04	3.83	3.19	1.49	8.8	3.06	4.36	0.87	2.99	1.95	3.42	8.19	5.6	9.33	6.14	8.58	4.5
247	16	Female	2.06	3.05	2.98	5.42	6.43	2.98	4.72	2.85	4.4	3.36	1.66	10.57	3.45	3.49	0.97	2.16	1.65	5.11	8.11	4.81	10.32	6.58	7.7	4.78
19	16	Male	2.72	2.72	3.95	7.08	6.98	3.29	5.2	3.81	4.39	3.31	2.2	8.57	2.96	3.54	1.08	3.72	2.08	6.01	10.61	7.06	13.97	9.95	9.59	6.78
14	17	Female	1.93	3.12	3.08	5.62	5.86	3.23	4.53	3.72	4.45	4.12	2.31	8.66	2.02	2.14	1.25	2.08	1.49	5.01	9.27	4.68	10.78	7.06	9	6.15
231	18	Female	1.82	2.86	3.83	6.84	7.74	3.99	5.99	3.59	5.07	4.48	2.85	9.53	4.28	4.77	1.43	2.47	1.87	4.22	8.58	4.97	12.46	6.67	9.56	4.34
6	19	Male	2.69	4.28	4.42	8.02	9.25	4.68	6.43	4.91	4.42	4.28	2.67	7.81	2.01	2.05	0.75	1.87	1.22	6.76	11.22	7.09	15.08	11.1	10.5	6.28
30	20	Male	2.24	2.92	4.26	9.01	9.83	4.81	6.27	4.49	5.66	5.6	2.43	10.7	3.49	3.91	0.94	2.97	2.2	6.32	11.46	8.4	12.32	8.48	7.83	6.74
34	21	Male	2.94	4.64	4.74	9.85	11.4	5.41	6.8	5.25	6.23	5.63	3.42	7.82	2.69	2.98	0.82	2.7	2.02	5.53	7.54	5.02	9.91	8.35	7.43	5.38
13	22	Female	2.92	4.56	4.82	8.64	7.95	4.84	5.93	5.21	5.53	5.19	3.29	7.78	2.16	2.86	1.22	1.99	1.23	6.04	9.91	7.03	11.33	8.4	11.88	6.1
10	22	Male	3.15	5.86	6.97	11.78	12.03	6.96	7.45	5.08	7.58	7.21	2.57	10.86	3.8	2.88	0.67	2.37	1.55	5.96	11.13	9.23	7.5	8.39	8.44	7.5
1	23	Female	3.54	4.59	5.38	7.75	8.02	3.92	5.55	4.09	5.7	3.97	3.04	7.71	1.77	1.71	0.7	1.93	1.53	5.81	10.48	5.93	8.52	8.08	9.01	5.44
228	26	Female	2.42	3.21	3.9	7.08	7.33	3.56	4.61	4.08	4.41	3.5	2.02	9.16	3.13	3.11	1.58	3.03	2	4.62	6.74	5.01	8.97	7.46	8.99	3.72
236	27	Female	2.52	3.95	4.08	5.95	5.83	3.8	4.95	3.15	4.47	4.21	2.07	9.02	3.81	3.77	1.77	2.46	1.75	6.35	9.58	5.64	11.31	8.67	7.65	5.34
12	27	Male	2.92	3.81	4.85	6.44	7.95	4.58	5.32	3.62	4.95	4.81	2.06	8.18	1.87	1.21	0.62	2.15	1.54	5.65	7.62	4.04	8.04	5.71	7.78	4.1
232	29	Female	4.15	7.57	6.95	11.65	11.38	6.06	7.17	5.06	5.21	6.36	4.81	7.86	2.69	2.47	0.95	2.95	2.13	5.22	9.03	6.81	11.03	9.03	9.32	5.94
245	29	Female	3.14	5.11	5.49	11.04	11.71	6.46	8.7	5.67	7.11	6.92	3.03	NA	NA	NA	NA	NA	NA	NA	NA	NA	NA	NA	NA	NA
